# Supplementary material for: Engineering the structural formula of N-doped molybdenum carbide nanowires for the deoxygenation of palmitic acid
Source: Royal Society of Chemistry journal article supplement (doi:10.1039/c9se01307e), 2020-01-01
Supplement: c9se01307e1.pdf [file c9se01307e1.pdf]

## Supplementary information

# Engineering of Structure Formula in N-doped Molybdenum Carbides Nanowires for Deoxygenation of Palmitic Acid

Xiaozhen Chen, Xiao Chen, Chuang Li, Changhai Liang\*

Laboratory of Advanced Materials and Catalytic Engineering, School of Chemical Engineering, Dalian University of Technology, Dalian116012, China. *Email:* [changhai@dlut.edu.cn](mailto:changhai@dlut.edu.cn)

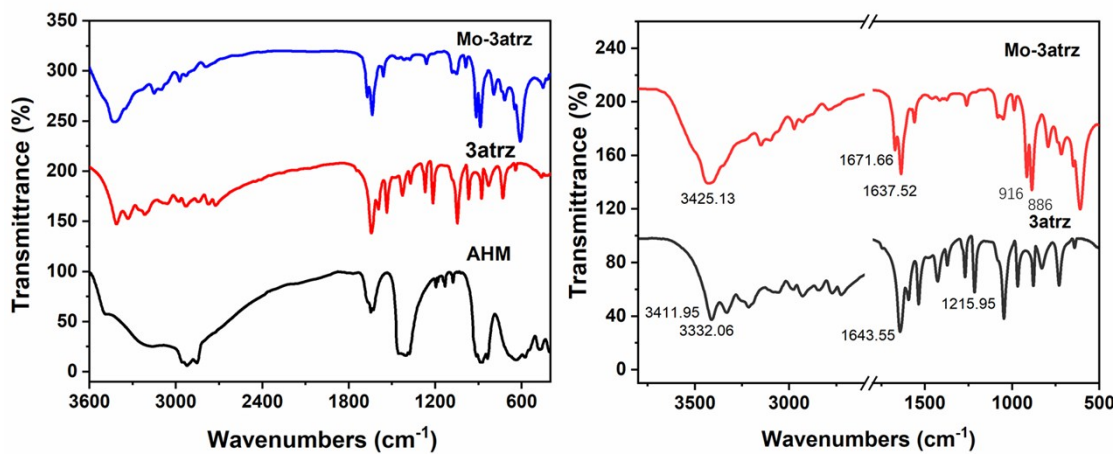

**Fig. S1** FTIR spectra of ammonium heptamolybdate (AHM), 3-amino-1,2,4-triazole (3atzr) and Mo-3atzr.

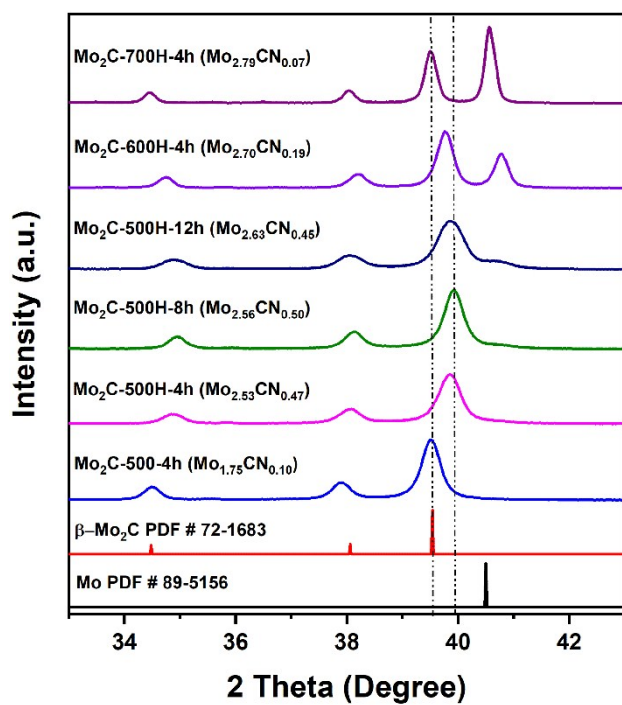

**Fig. S2** The XRD pattern of the as-prepared samples obtained at different carburization parameters.

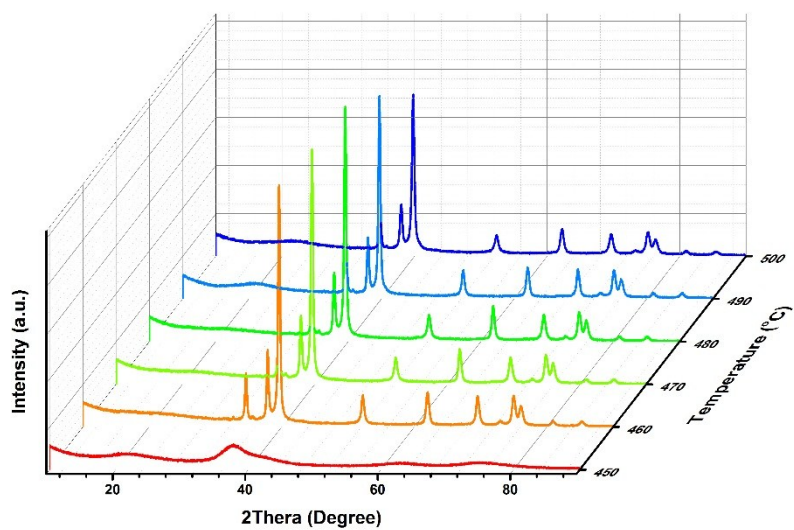

**Fig. S3** XRD patterns of samples obtained via pyrolysing the Mo-3atrz precursor at (different temperature (450-500/10°C) for 4 h in Ar/H<sub>2</sub> with a ramp rate of 5 °C min<sup>-1</sup>).

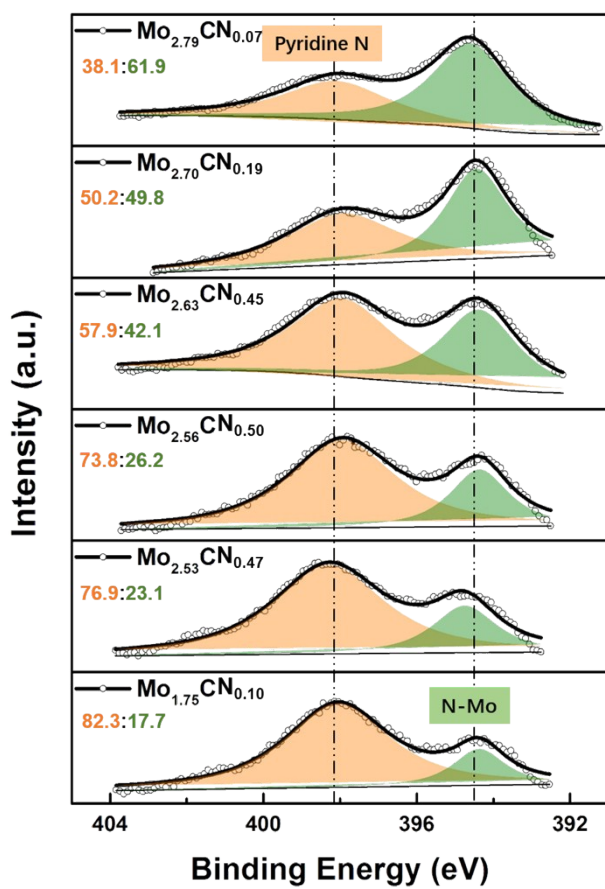

Fig. S4 N 1s XPS spectra of the as-prepared Mo<sub>x</sub>CN<sub>y</sub> nanowires

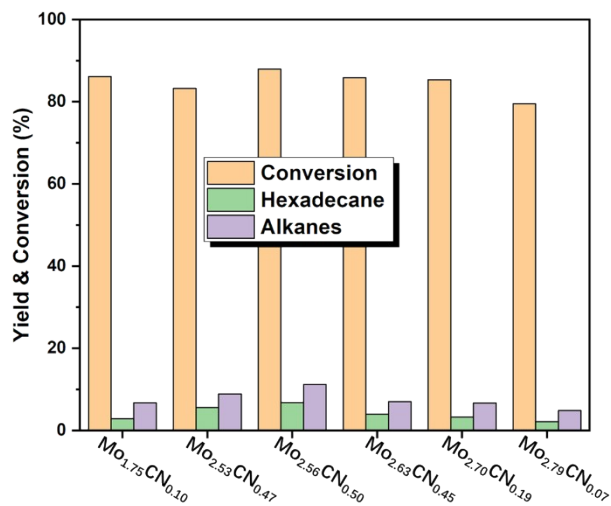

**Fig. S5** Comparison of the alkanes and hexadecane yields for palmitic acid conversion over  $\text{Mo}_x\text{CN}_y$ . at similar conversion (78~88 %). Reaction conditions: 300 °C and 4 MPa, 0.05 g catalyst.

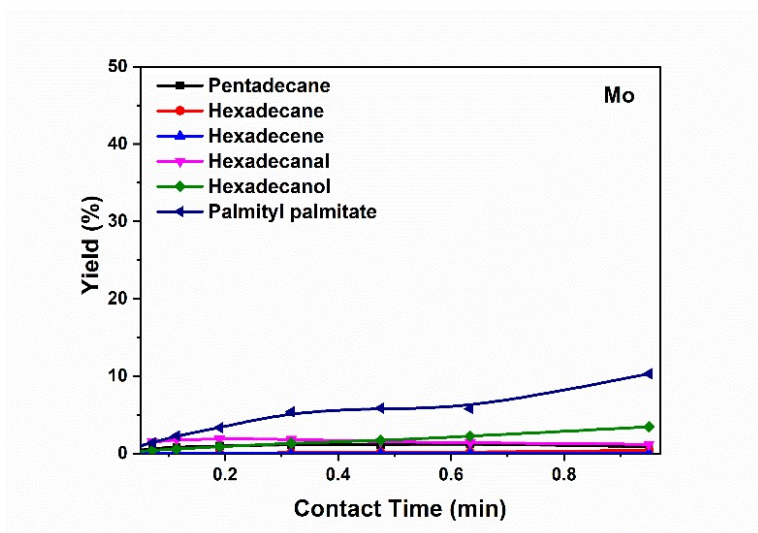

**Fig. S6** Conversion of palmitic acid over Mo. PA conversion conditions: 0.05g Mo, 300 °C and 4 MPa.

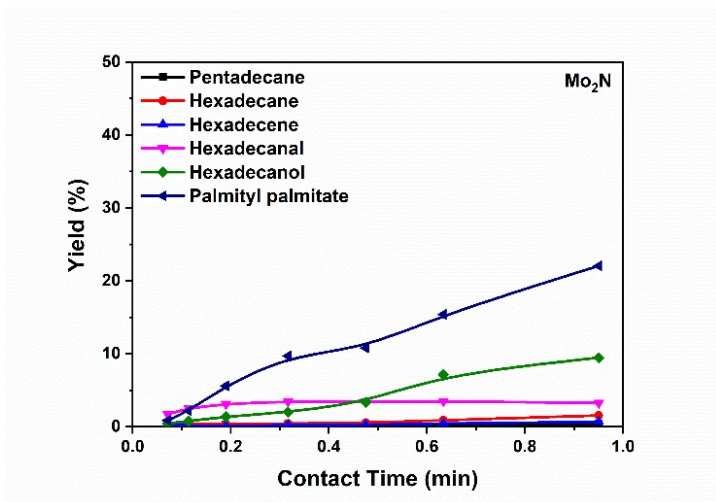

**Fig. S7** Conversion of palmitic acid over  $\text{Mo}_2\text{N}$  obtained by nitriding  $\text{MoO}_3$  in  $\text{NH}_3$ . PA conversion conditions: 0.05g  $\text{Mo}_2\text{N}$ , 300 °C and 4MPa.
